# Supplementary material for: Patents on Endophytic Fungi Related to Secondary Metabolites and Biotransformation Applications
Source: PubMed Central journal article supplement (PMC7344749; doi:10.3390/jof6020058), 2020-05-01

**Supplementary data**

# **Patents on endophytic fungi related to secondary metabolites and biotransformation applications**

Daniel Torres-Mendoza<sup>1,2</sup>, Humbeto E. Ortega<sup>1,3</sup>, Luis Cubilla-Rios<sup>1\*</sup>

1 Laboratory of Tropical Bioorganic Chemistry, Faculty of Natural, Exact Sciences and Technology, University of Panama, Panama.

2 Vicerrectoría de Investigación y Postgrado, University of Panama, Panama.

3 Department of Organic Chemistry, Faculty of Natural, Exact Sciences and Technology, University of Panama, Panama.

**Figure S1.** Structures of the secondary metabolites listed in Table 1 and 2

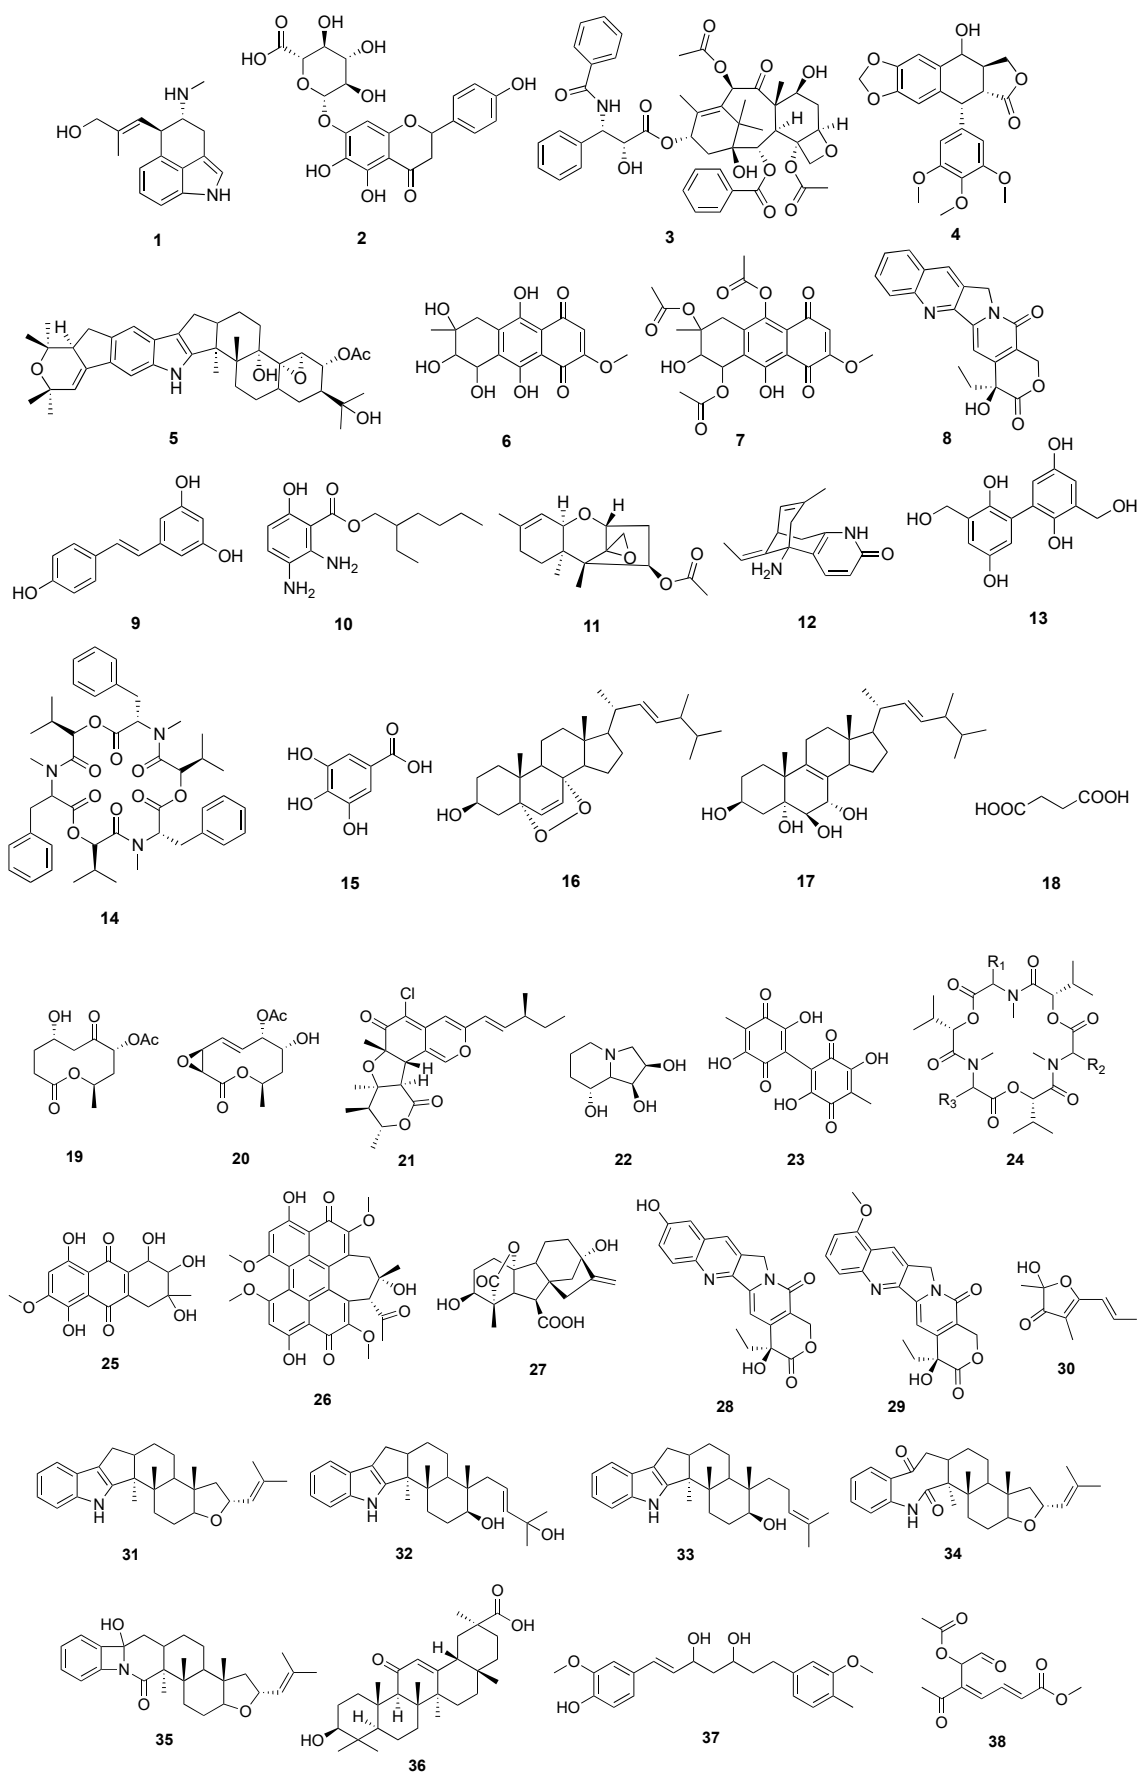

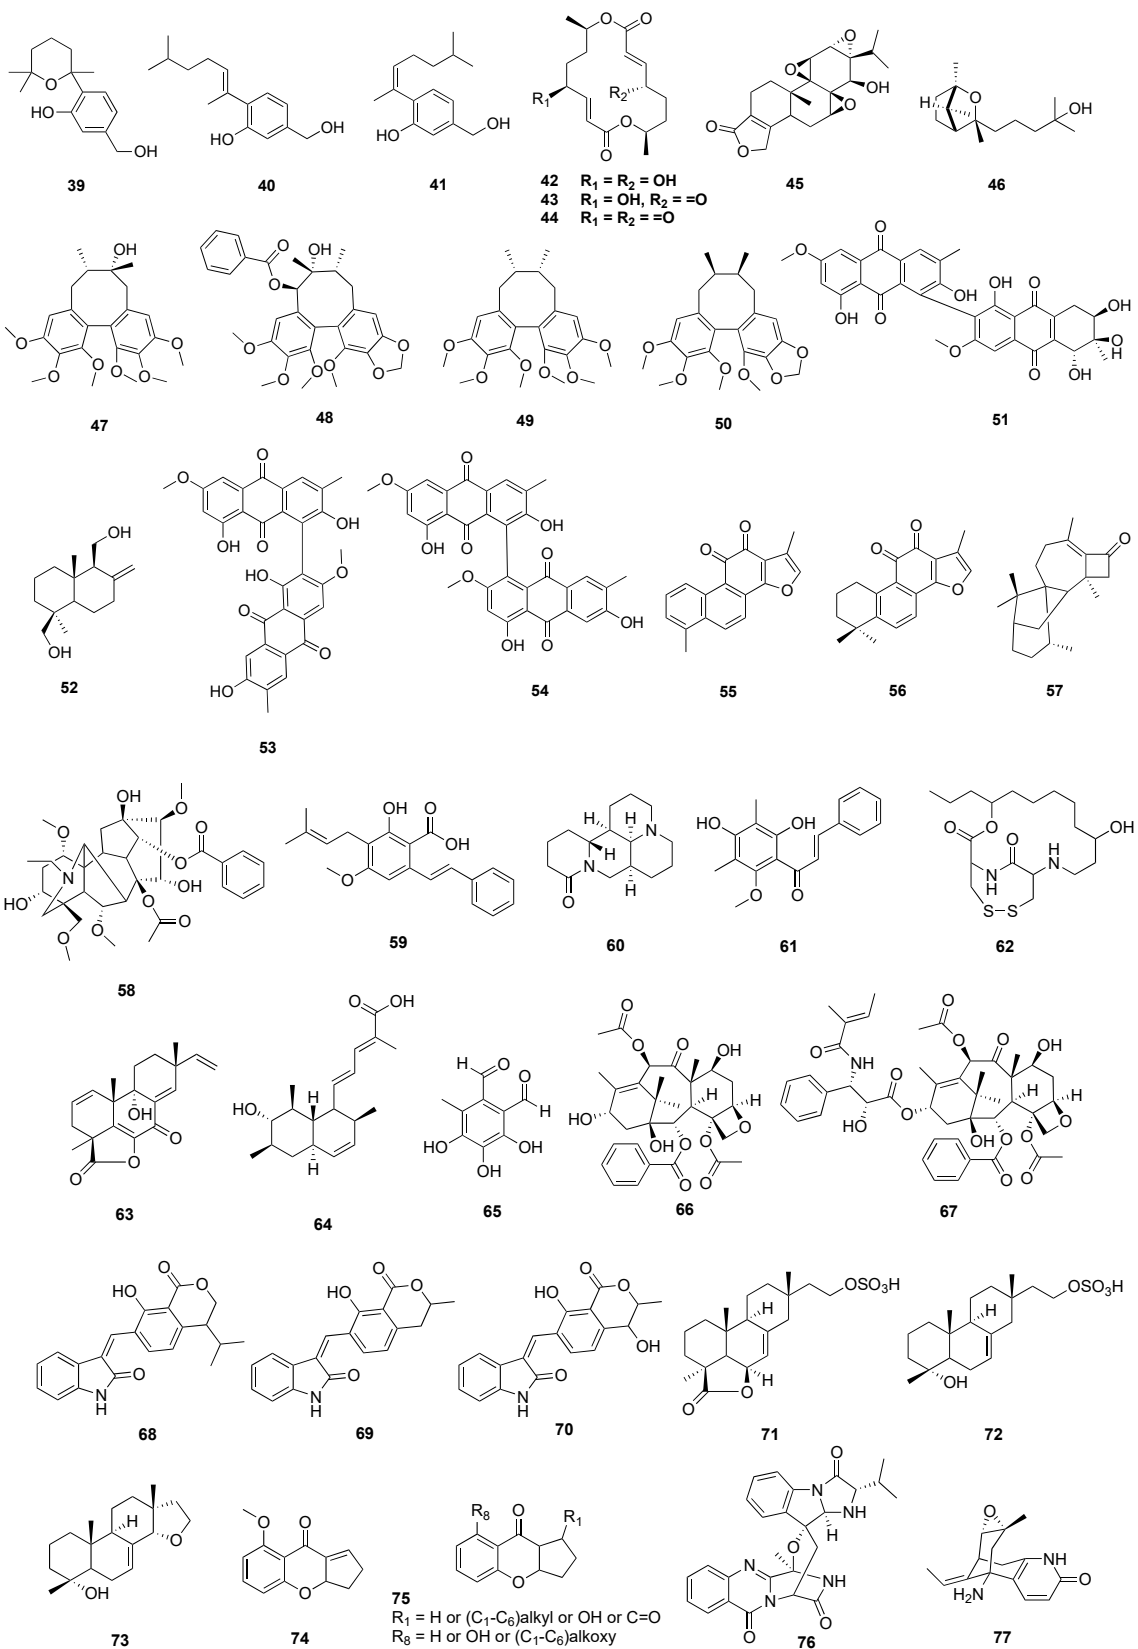

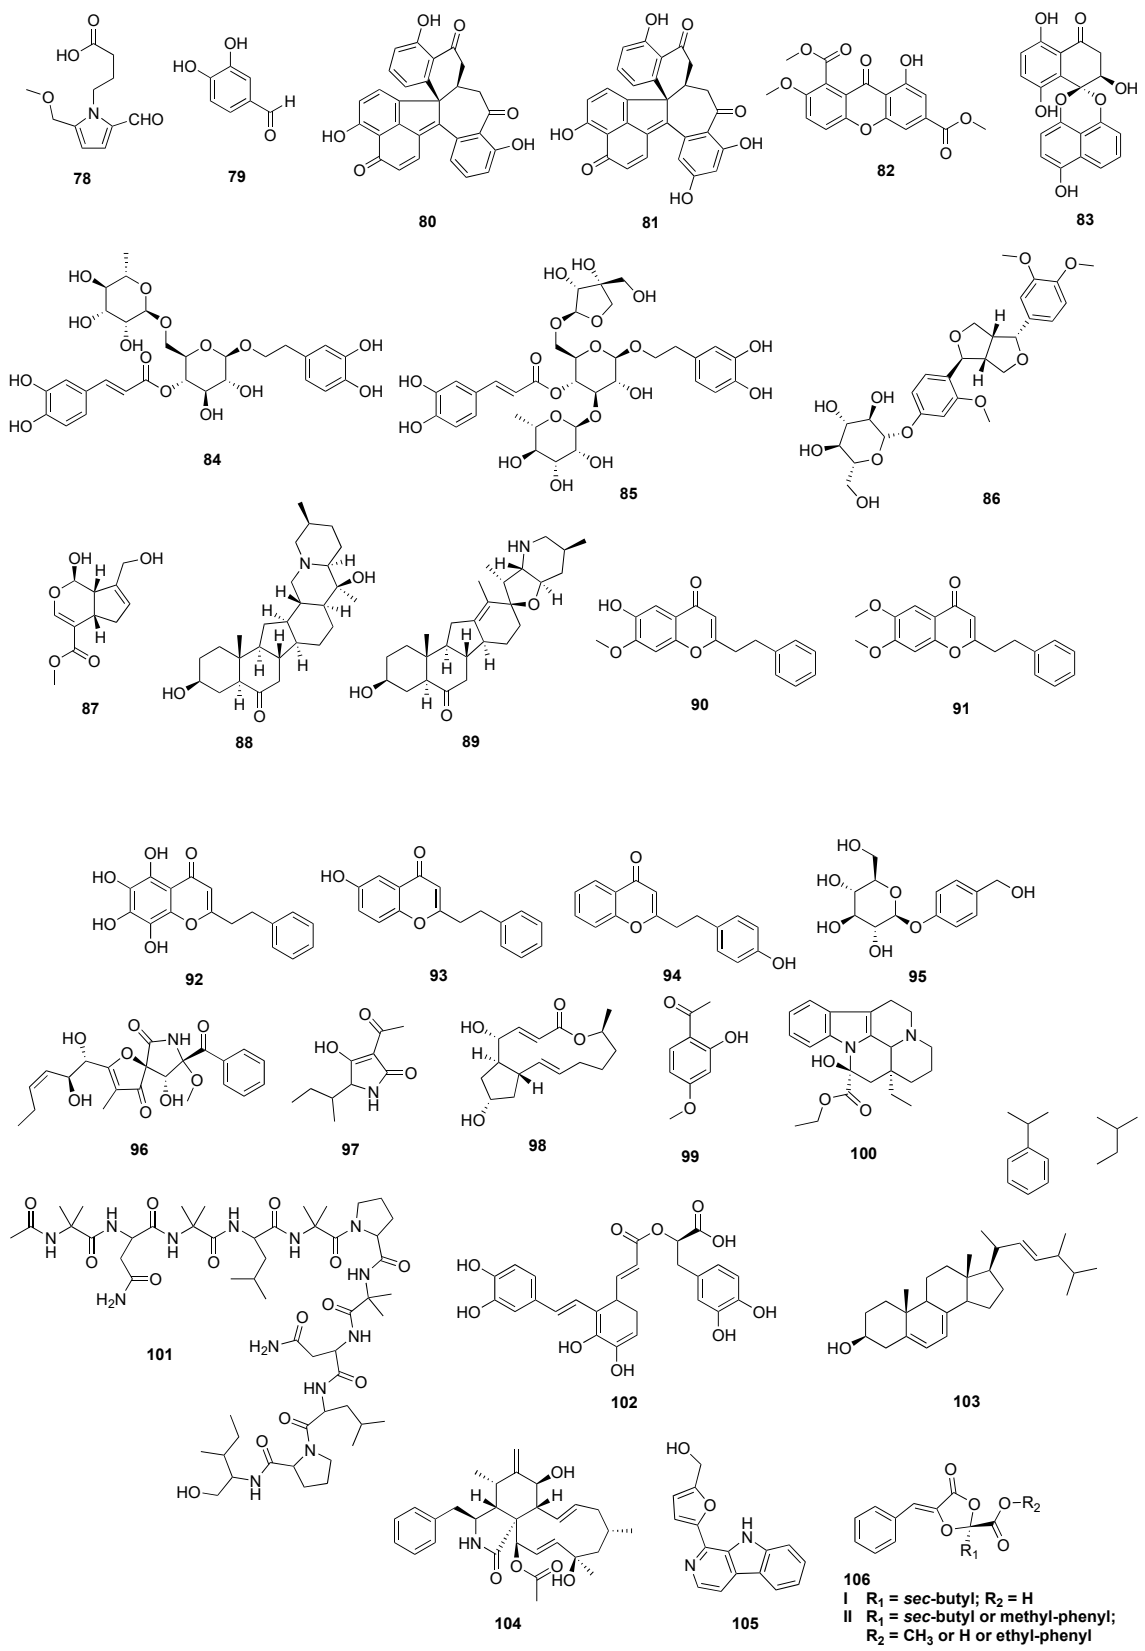

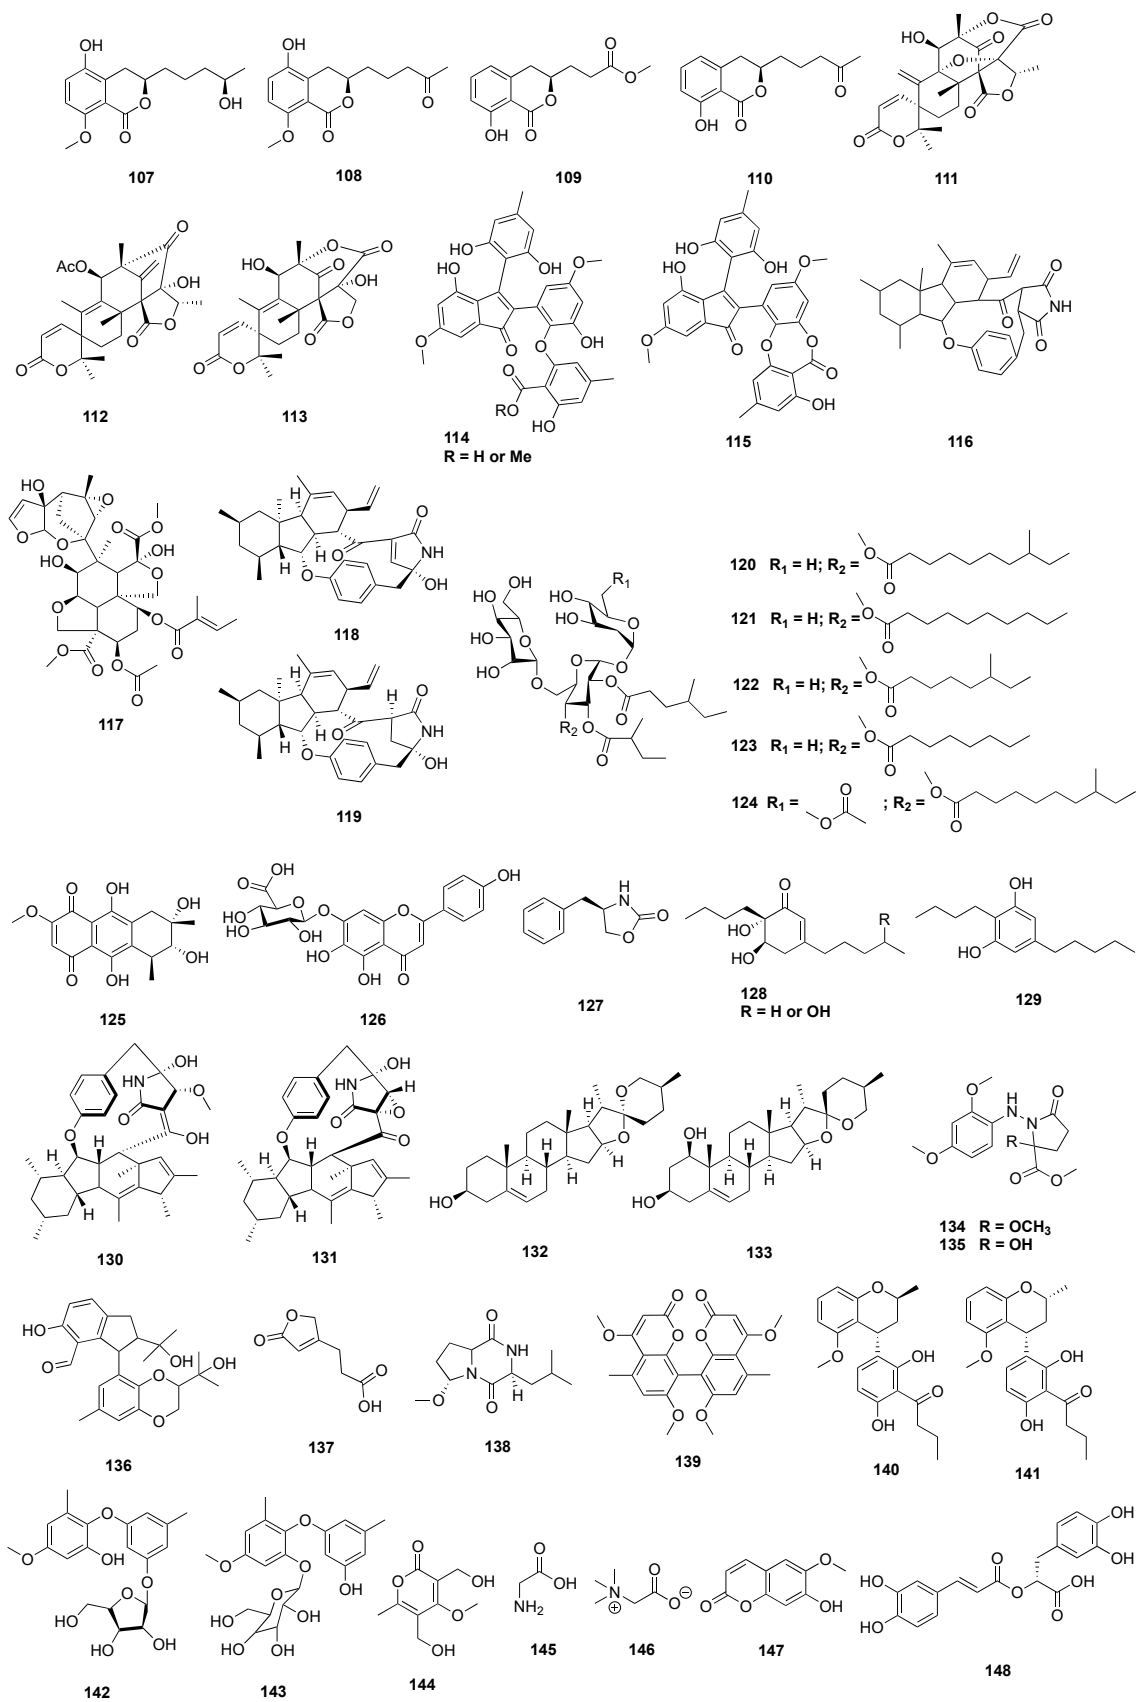

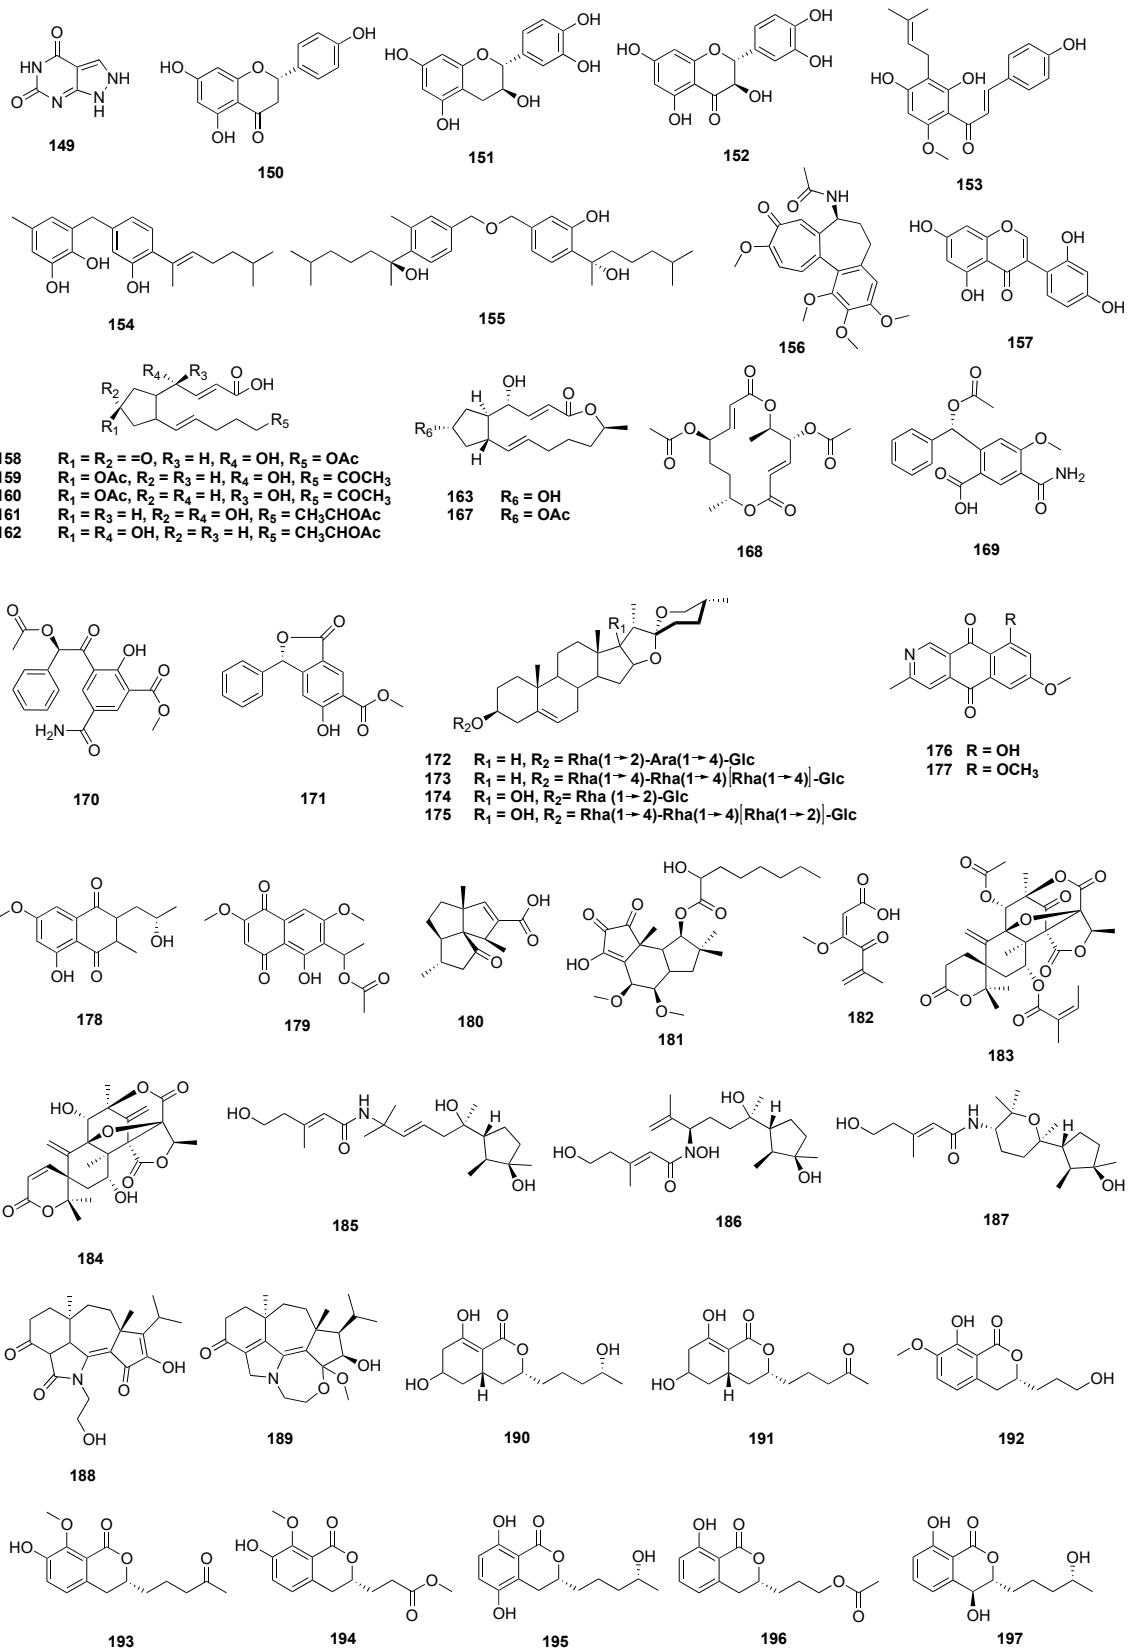

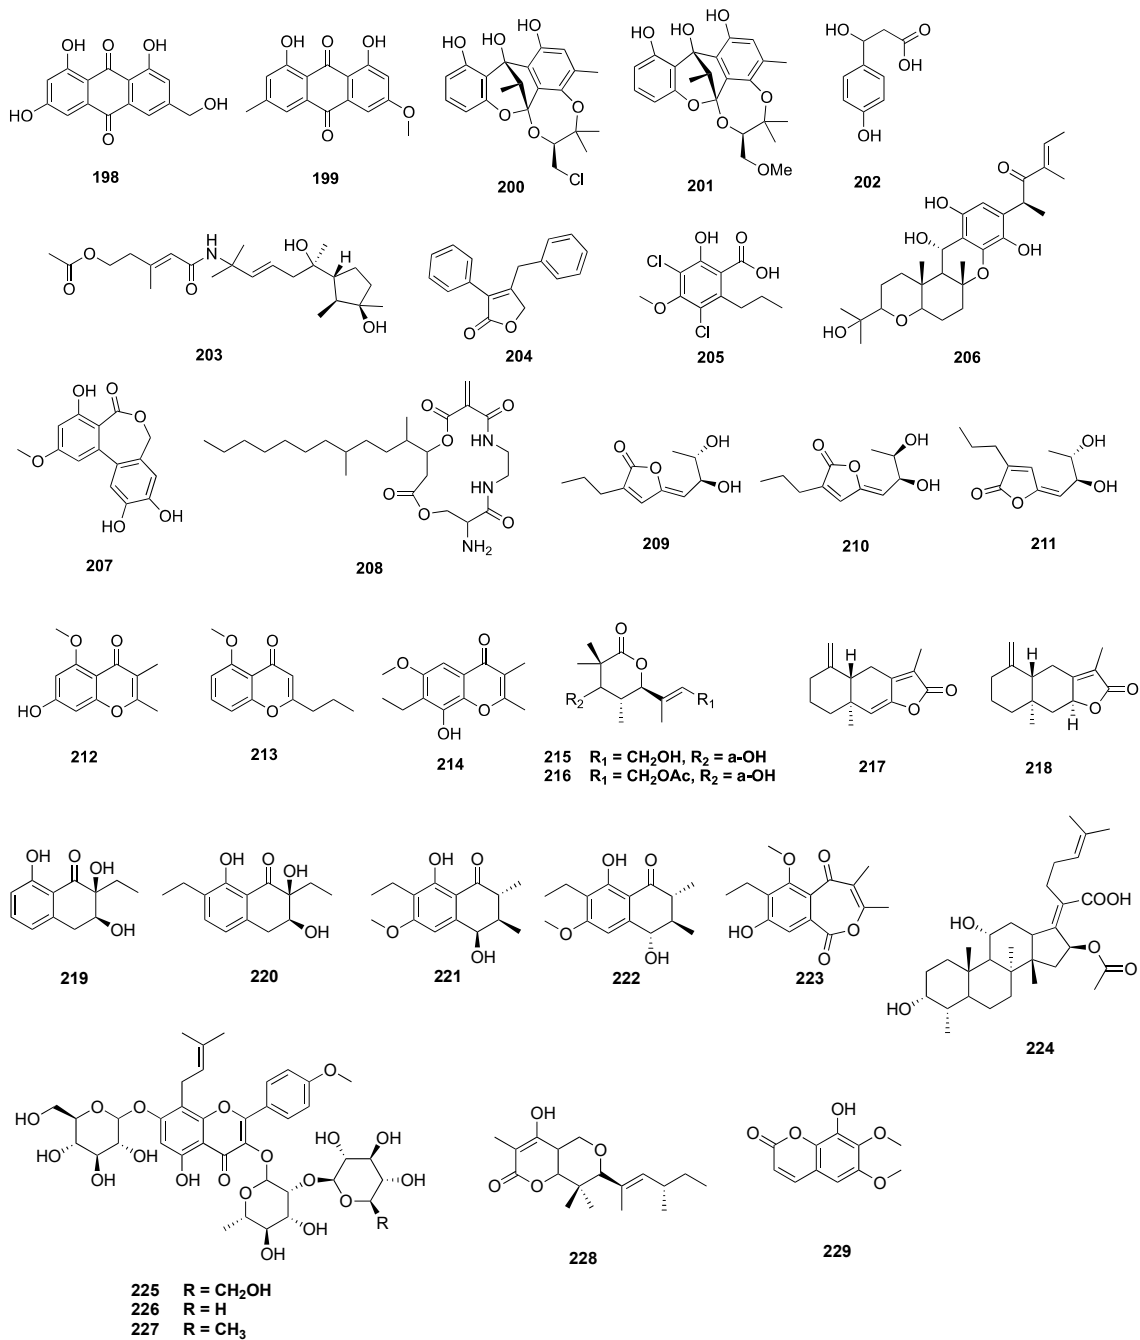

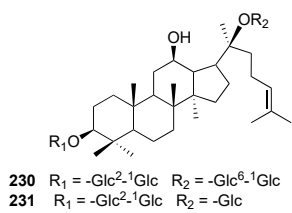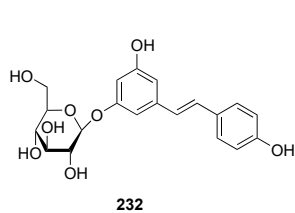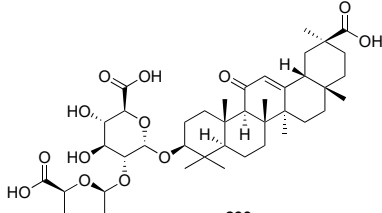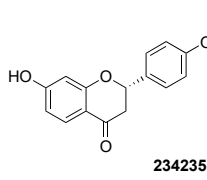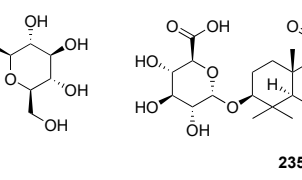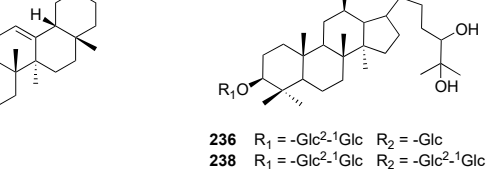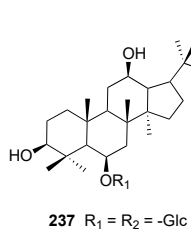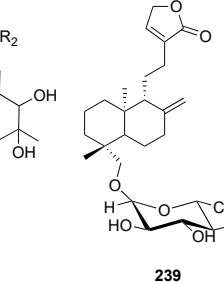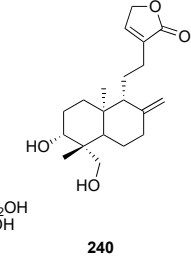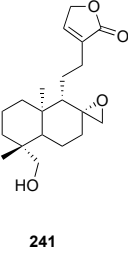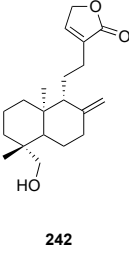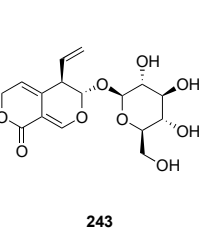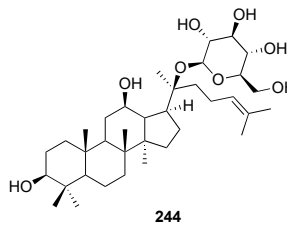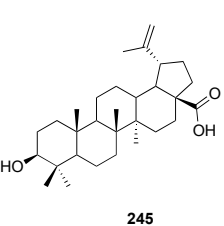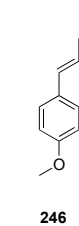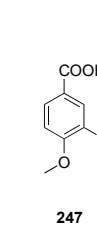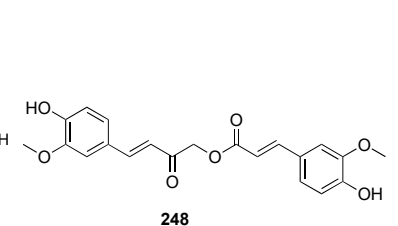

Supplement: jof-06-00058-s001.pdf [file jof-06-00058-s001.pdf]
